# Supplementary material
Source: publisher site journal article supplement (https://www.spandidos-publications.com/8577/downloadSupplementary)

Figure S1. Network plot for the primary analysis (seven-node network). mCRC, metastatic colorectal cancer. FOLFOX, 5-fluorouracil, leucovorin and oxaliplatin; FOLFIRI, 5-fluorouracil, leucovorin and irinotecan; 5-FU/LV, 5-fluorouracil/leucovorin; Cet, cetuximab; Cet(maint.), Cet maintenance; Chemo, chemotherapy; Bev, bevacizumab.

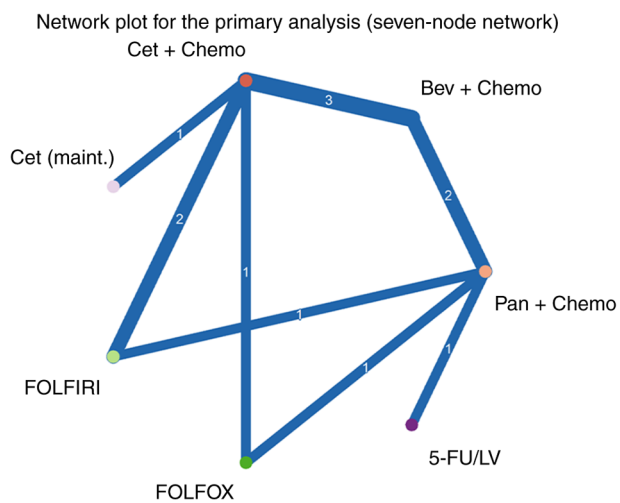



Figure S3. Bubble plots and dot plots. PFS, progression-free survival; ORR, objective response rate; HR, hazard ratio; OR, odds ratio; Chemo, chemotherapy; Bev, bevacizumab.

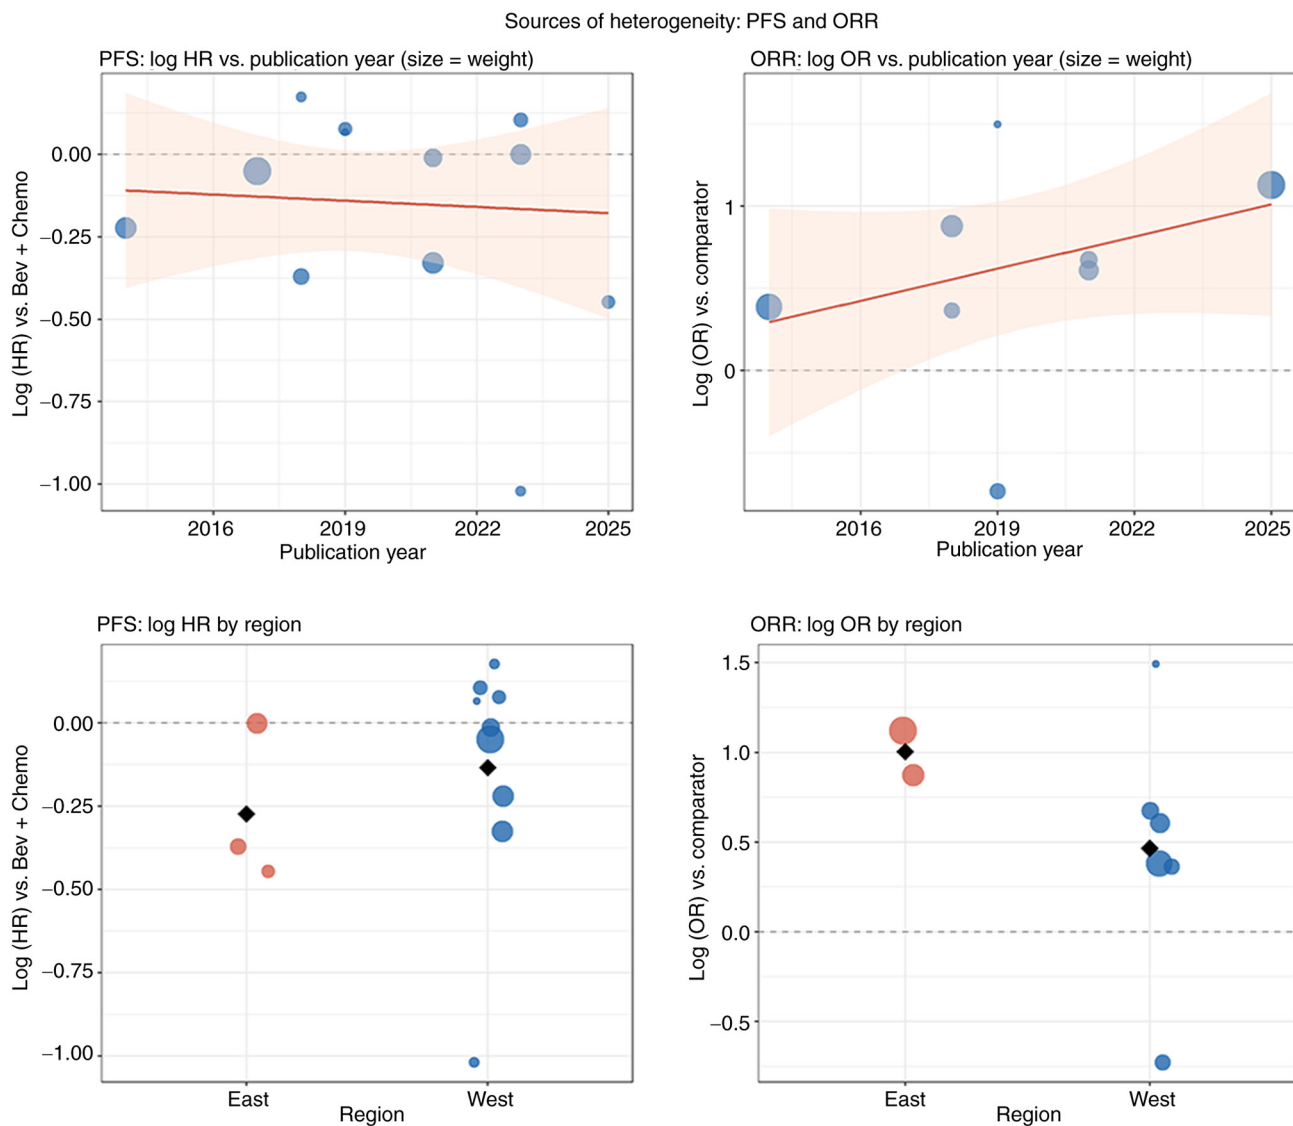

Figure S4. Comparison-adjusted funnel plots for OS, PFS, and ORR. OS, overall survival; PFS, progression-free survival; ORR, objective response rate. FOLFOX, 5-fluorouracil, leucovorin and oxaliplatin; FOLFIRI, 5-fluorouracil, leucovorin and irinotecan; Cet, cetuximab; Cet(maint.), Cet maintenance; 5-FU/LV, 5-fluorouracil/leucovorin; Chemo, chemotherapy; Bev, bevacizumab.

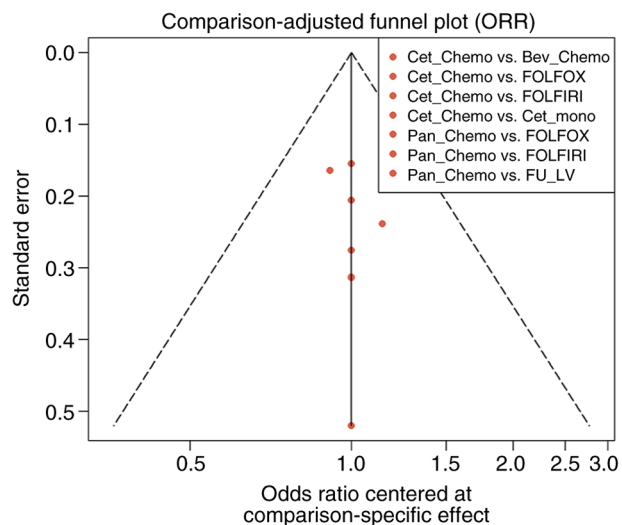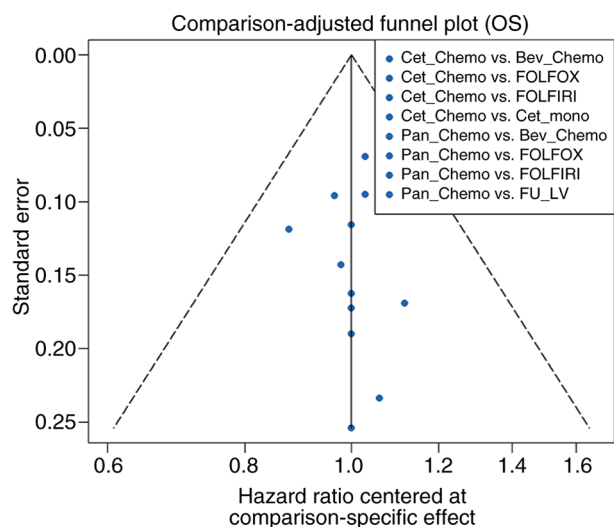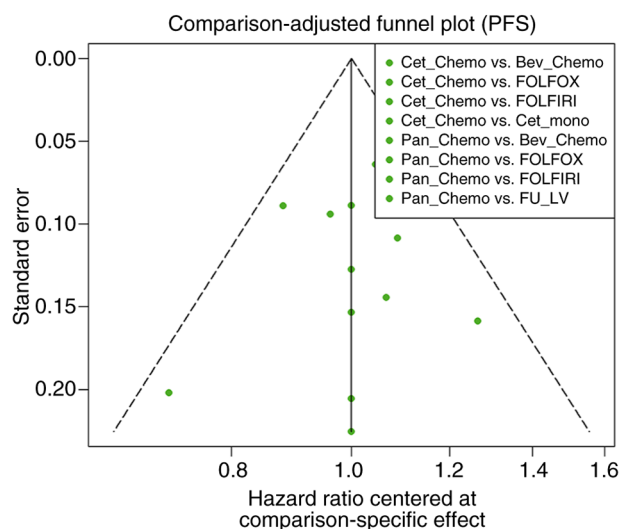

Supplement: Supplementary file 1 [file downloadSupplementary]
